# Supplementary material for: Fine mapping of candidate quantitative trait loci for plant and ear height in a maize nested-association mapping population
Source: PubMed Central journal article supplement (PMC9386523; doi:10.3389/fpls.2022.963985), 2022-08-04
Supplement: Data_Sheet_1.pdf [file Data_Sheet_1.pdf]

## *Supplementary Material*

### 1 Supplementary Tables

Supplemental Table 1. Annotation of SNP variants

|        | Category            | Number of SNPs |
|--------|---------------------|----------------|
| Exonic | Stop gain           | 103            |
|        | Stop loss           | 22             |
|        | Synonymous          | 2994           |
|        | Non-synonymous      | 3301           |
|        | unknowns            | 0              |
|        | Upstream            | 4320           |
|        | missense            | 0              |
|        | Intronic            | 15002          |
|        | Splicing            | 52             |
|        | UTR3                | 3149           |
|        | UTR5                | 1897           |
|        | UTR5;UTR3           | 519            |
|        | Downstream          | 5071           |
|        | upstream/downstream | 280            |
|        | Intergenic          | 227984         |
|        | ts                  | 195082         |
|        | tv                  | 69612          |
|        | ts/tv               | 2.802          |
|        | <b>Total</b>        | <b>264694</b>  |

Supplemental Table 2. GWAS signals of maize NAM population

| <b>Pheno</b> | <b>Chr</b> | <b>Position</b> | <b>P.value(-log10)</b> |
|--------------|------------|-----------------|------------------------|
| EH.BLUP      | 1          | 207482464       | 4.559666985            |
| EH.BLUP      | 1          | 207482494       | 5.797210256            |
| EH.BLUP      | 1          | 207482507       | 5.218006303            |
| EH.BLUP      | 1          | 207639576       | 4.563364635            |
| EH.BLUP      | 1          | 208281050       | 4.706687501            |
| EH.BLUP      | 1          | 208673533       | 5.518095679            |
| EH.BLUP      | 1          | 208673540       | 5.46060648             |
| EH.BLUP      | 1          | 208673575       | 5.752325788            |
| EH.BLUP      | 1          | 210043412       | 4.695113855            |
| EH.BLUP      | 1          | 210665124       | 5.104639127            |
| EH.BLUP      | 1          | 210665164       | 5.210352333            |
| EH.BLUP      | 1          | 210665314       | 4.706926133            |
| EH.BLUP      | 1          | 246468926       | 4.715791382            |
| EH.BLUP      | 1          | 246468927       | 4.98625835             |
| EH.BLUP      | 1          | 246468944       | 4.833293377            |
| EH.BLUP      | 1          | 246468972       | 4.864847079            |
| EH.BLUP      | 1          | 246468978       | 4.708992272            |
| EH.BLUP      | 1          | 246468988       | 5.147617823            |
| EH.BLUP      | 4          | 35832257        | 4.636371329            |
| EH.BLUP      | 6          | 46175100        | 4.624864208            |
| EH.BLUP      | 6          | 86703193        | 4.568860237            |
| EH.BLUP      | 6          | 137707961       | 5.195433983            |
| EH.BLUP      | 7          | 46200395        | 4.788969604            |
| EH.BLUP      | 7          | 64433742        | 6.301457813            |
| EH.BLUP      | 8          | 3337902         | 4.658492943            |
| EH.BLUP      | 8          | 93944747        | 5.165075381            |
| EH_BS        | 1          | 49662643        | 5.075542147            |
| EH_BS        | 1          | 207482464       | 4.786451331            |
| EH_BS        | 1          | 207482494       | 5.860476027            |
| EH_BS        | 1          | 207482507       | 5.206189179            |
| EH_BS        | 1          | 246468926       | 4.777243562            |
| EH_BS        | 1          | 246468927       | 5.062914847            |
| EH_BS        | 1          | 246468944       | 4.791453147            |
| EH_BS        | 1          | 246468972       | 4.857079521            |
| EH_BS        | 1          | 246468978       | 4.811996013            |
| EH_BS        | 1          | 246468988       | 5.094702945            |
| EH_BS        | 1          | 252339252       | 4.704393816            |
| EH_BS        | 5          | 110227265       | 4.739747748            |
| EH_BS        | 5          | 110227371       | 4.768510612            |
| EH_BS        | 6          | 46175100        | 5.143912644            |
| EH_BS        | 6          | 46175172        | 4.97208901             |

|         |   |           |             |
|---------|---|-----------|-------------|
| EH_BS   | 6 | 76107590  | 4.784365628 |
| EH_BS   | 6 | 86703175  | 5.49165611  |
| EH_BS   | 6 | 86703193  | 5.178280201 |
| EH_BS   | 6 | 137707961 | 5.474490095 |
| EH_BS   | 7 | 64433742  | 5.052713166 |
| EH_BS   | 7 | 83093842  | 4.803447028 |
| EH_BS   | 7 | 120158598 | 4.862313275 |
| EH_BS   | 7 | 120158619 | 4.806734801 |
| EH_BS   | 8 | 127325009 | 5.03853836  |
| EH_DH   | 1 | 208281050 | 5.076780339 |
| EH_DH   | 1 | 208673533 | 4.789269182 |
| EH_DH   | 1 | 208673540 | 4.668388103 |
| EH_DH   | 1 | 208673575 | 4.812212124 |
| EH_DH   | 1 | 210043412 | 6.317816719 |
| EH_DH   | 1 | 210043418 | 6.17055433  |
| EH_DH   | 1 | 210043476 | 6.01295934  |
| EH_DH   | 1 | 210215708 | 4.736904642 |
| EH_DH   | 1 | 254684146 | 4.828381748 |
| EH_DH   | 5 | 131972580 | 4.839710073 |
| EH_DH   | 5 | 131972649 | 4.904533447 |
| EH_DH   | 5 | 131972668 | 4.915761239 |
| EH_DH   | 5 | 136999867 | 4.64888873  |
| EH_DH   | 7 | 64433742  | 4.674202817 |
| EH_DH   | 9 | 58065933  | 4.866435343 |
| EH_DH   | 9 | 58065944  | 4.563579475 |
| EH_DH   | 9 | 58065953  | 4.632234849 |
| EH_DH   | 9 | 58065985  | 5.214018404 |
| PH.BLUP | 1 | 206008766 | 4.679253429 |
| PH.BLUP | 1 | 206090508 | 4.647606609 |
| PH.BLUP | 1 | 207482464 | 4.750209017 |
| PH.BLUP | 1 | 207482494 | 5.961917617 |
| PH.BLUP | 1 | 207482507 | 5.327623384 |
| PH.BLUP | 1 | 208281050 | 4.805978887 |
| PH.BLUP | 1 | 208669508 | 4.680874345 |
| PH.BLUP | 1 | 208673533 | 5.27808254  |
| PH.BLUP | 1 | 208673540 | 5.257061444 |
| PH.BLUP | 1 | 208673575 | 5.45407778  |
| PH.BLUP | 1 | 208751861 | 4.979633207 |
| PH.BLUP | 1 | 210043412 | 6.528744782 |
| PH.BLUP | 1 | 210043418 | 5.861725891 |
| PH.BLUP | 1 | 210043476 | 5.736083903 |
| PH.BLUP | 1 | 210665124 | 4.798270773 |
| PH.BLUP | 1 | 210665164 | 4.962716575 |
| PH.BLUP | 1 | 210665314 | 4.742534333 |

|         |    |           |             |
|---------|----|-----------|-------------|
| PH.BLUP | 1  | 246468926 | 4.804321874 |
| PH.BLUP | 1  | 246468927 | 4.922530585 |
| PH.BLUP | 1  | 246468944 | 4.959296834 |
| PH.BLUP | 1  | 246468972 | 4.918489794 |
| PH.BLUP | 1  | 246468978 | 4.552052814 |
| PH.BLUP | 1  | 246468988 | 5.088655092 |
| PH.BLUP | 1  | 246469161 | 4.583528129 |
| PH.BLUP | 1  | 252312837 | 4.909935564 |
| PH.BLUP | 2  | 20879902  | 4.5772216   |
| PH.BLUP | 2  | 20879913  | 4.680561961 |
| PH.BLUP | 2  | 20879938  | 4.567760419 |
| PH.BLUP | 2  | 21796615  | 4.553785731 |
| PH.BLUP | 2  | 140046410 | 5.027373936 |
| PH.BLUP | 2  | 140046422 | 4.952913624 |
| PH.BLUP | 2  | 160038044 | 5.601770121 |
| PH.BLUP | 2  | 160038076 | 4.892507707 |
| PH.BLUP | 2  | 160038141 | 4.574196059 |
| PH.BLUP | 5  | 89816073  | 4.973597927 |
| PH.BLUP | 5  | 89816174  | 5.809788963 |
| PH.BLUP | 5  | 89816181  | 5.740671731 |
| PH.BLUP | 5  | 89816200  | 4.959881882 |
| PH.BLUP | 6  | 46175100  | 5.19181768  |
| PH.BLUP | 6  | 46175172  | 4.984942343 |
| PH.BLUP | 6  | 86703175  | 4.616307033 |
| PH.BLUP | 6  | 137707961 | 6.800282198 |
| PH.BLUP | 10 | 149356827 | 4.783845434 |
| PH_BS   | 1  | 207482494 | 5.391272139 |
| PH_BS   | 1  | 207482507 | 4.665793113 |
| PH_BS   | 1  | 210665124 | 4.732821718 |
| PH_BS   | 1  | 210665164 | 4.865800339 |
| PH_BS   | 1  | 210665314 | 4.680994772 |
| PH_BS   | 2  | 140046410 | 5.926809304 |
| PH_BS   | 2  | 140046422 | 5.938649034 |
| PH_BS   | 2  | 160038044 | 4.843063475 |
| PH_BS   | 2  | 160038076 | 4.725127019 |
| PH_BS   | 6  | 137707961 | 5.278786306 |
| PH_BS   | 8  | 42564592  | 4.712113796 |
| PH_BS   | 8  | 100232891 | 4.64963315  |
| PH_DH   | 1  | 202365107 | 5.359216808 |
| PH_DH   | 1  | 202365114 | 5.290072899 |
| PH_DH   | 1  | 202365143 | 4.643564669 |
| PH_DH   | 1  | 202365151 | 4.585620647 |
| PH_DH   | 1  | 208673533 | 5.126163152 |

|         |    |           |             |
|---------|----|-----------|-------------|
| PH_DH   | 1  | 208673540 | 5.120724444 |
| PH_DH   | 1  | 208673575 | 5.26444023  |
| PH_DH   | 1  | 210043412 | 7.165439073 |
| PH_DH   | 1  | 210043418 | 6.644315083 |
| PH_DH   | 1  | 210043476 | 6.469602141 |
| PH_DH   | 1  | 210215708 | 5.004366647 |
| PH_DH   | 2  | 191362024 | 4.731267351 |
| PH_DH   | 4  | 231434376 | 5.290675004 |
| PH_DH   | 4  | 231434390 | 5.442181274 |
| PH_DH   | 4  | 231434419 | 5.046633196 |
| PH_DH   | 5  | 89816073  | 5.63226854  |
| PH_DH   | 5  | 89816174  | 6.256803398 |
| PH_DH   | 5  | 89816181  | 6.188072902 |
| PH_DH   | 5  | 89816200  | 4.868024453 |
| PH_DH   | 5  | 186483923 | 4.794282751 |
| PH_DH   | 6  | 23027769  | 4.621294807 |
| PH_DH   | 6  | 46175100  | 4.986236425 |
| PH_DH   | 6  | 46175172  | 4.832533293 |
| PH_DH   | 6  | 137707961 | 7.378415525 |
| EP.BLUP | 8  | 127325009 | 4.642257171 |
| EP.BLUP | 9  | 43004112  | 4.589571921 |
| EP.BLUP | 10 | 35248167  | 5.637471948 |
| EP.BLUP | 10 | 62334395  | 4.911696579 |
| EP_BS   | 2  | 236959420 | 4.985024408 |
| EP_BS   | 5  | 36920481  | 5.219970656 |
| EP_BS   | 5  | 36920490  | 5.310017786 |
| EP_BS   | 5  | 36920496  | 5.158457673 |
| EP_BS   | 5  | 36920505  | 5.017365633 |
| EP_BS   | 6  | 78259284  | 4.65259407  |
| EP_BS   | 8  | 105933692 | 4.559904491 |
| EP_BS   | 8  | 127325009 | 6.118588222 |
| EP_BS   | 8  | 132348643 | 4.622164476 |
| EP_BS   | 8  | 134406114 | 4.783193359 |
| EP_BS   | 8  | 134725969 | 4.810278726 |
| EP_BS   | 9  | 114021372 | 5.479541513 |
| EP_BS   | 9  | 114021456 | 5.492588398 |
| EP_DH   | 1  | 21656844  | 4.893110361 |
| EP_DH   | 1  | 157840817 | 4.561513134 |
| EP_DH   | 1  | 157840853 | 4.724947203 |
| EP_DH   | 9  | 43004112  | 4.958922916 |
| EP_DH   | 10 | 35248167  | 4.633759269 |
| EP_DH   | 10 | 58353427  | 4.69252945  |

---

Supplemental Table 3. Annotation of candidate genes associated by GWAS for PH and EH phenotypes

| Pheno   | chr | start     | end       | peakPOS   | ref | alt | peak_value | transcript_ID  |
|---------|-----|-----------|-----------|-----------|-----|-----|------------|----------------|
| EH.BLUP | 1   | 207462464 | 207502507 | 207482494 | T   | C   | 5.7972103  | Zm00001d031938 |
| EH.BLUP | 1   | 207619576 | 207659576 | 207639576 | C   | T   | 4.5633646  | Zm00001d031942 |
| EH.BLUP | 1   | 208261050 | 208301050 | 208281050 | T   | G   | 4.7066875  | NA             |
| EH.BLUP | 1   | 208653533 | 208693575 | 208673575 | C   | A   | 5.7523258  | Zm00001d031985 |
| EH.BLUP | 1   | 210023412 | 210063412 | 210043412 | G   | A   | 4.6951139  | NA             |
| EH.BLUP | 1   | 210645124 | 210685314 | 210665164 | A   | G   | 5.2103523  | NA             |
| EH.BLUP | 1   | 246448926 | 246488988 | 246468988 | G   | T   | 5.1476178  | NA             |
| EH.BLUP | 4   | 35812257  | 35852257  | 35832257  | T   | C   | 4.6363713  | NA             |
| EH.BLUP | 6   | 46155100  | 46195100  | 46175100  | T   | C   | 4.6248642  | Zm00001d035762 |
| EH.BLUP | 6   | 86683193  | 86723193  | 86703193  | G   | A   | 4.5688602  | NA             |
| EH.BLUP | 6   | 137687961 | 137727961 | 137707961 | G   | A   | 5.195434   | Zm00001d037785 |
| EH.BLUP | 7   | 46180395  | 46220395  | 46200395  | C   | T   | 4.7889696  | NA             |
| EH.BLUP | 7   | 64413742  | 64453742  | 64433742  | T   | C   | 6.3014578  | NA             |
| EH.BLUP | 8   | 3317902   | 3357902   | 3337902   | G   | A   | 4.6584929  | Zm00001d008258 |
| EH.BLUP | 8   | 3317902   | 3357902   | 3337902   | G   | A   | 4.6584929  | Zm00001d008259 |
| EH.BLUP | 8   | 93924747  | 93964747  | 93944747  | G   | T   | 5.1650754  | NA             |
| EH_BS   | 1   | 49642643  | 49682643  | 49662643  | C   | T   | 5.0755421  | Zm00001d028887 |
| EH_BS   | 1   | 207462464 | 207502507 | 207482494 | T   | C   | 5.860476   | Zm00001d031938 |
| EH_BS   | 1   | 246448926 | 246488988 | 246468988 | G   | T   | 5.0947029  | NA             |
| EH_BS   | 1   | 252319252 | 252359252 | 252339252 | C   | T   | 4.7043938  | Zm00001d033154 |
| EH_BS   | 1   | 252319252 | 252359252 | 252339252 | C   | T   | 4.7043938  | Zm00001d033155 |
| EH_BS   | 1   | 252319252 | 252359252 | 252339252 | C   | T   | 4.7043938  | Zm00001d033156 |
| EH_BS   | 5   | 110207265 | 110247371 | 110227371 | G   | A   | 4.7685106  | NA             |
| EH_BS   | 6   | 46155100  | 46195172  | 46175100  | T   | C   | 5.1439126  | Zm00001d035762 |

|         |   |           |           |           |   |   |           |                |
|---------|---|-----------|-----------|-----------|---|---|-----------|----------------|
| EH_BS   | 6 | 76087590  | 76127590  | 76107590  | C | G | 4.7843656 | NA             |
| EH_BS   | 6 | 86683175  | 86723193  | 86703175  | C | A | 5.4916561 | NA             |
| EH_BS   | 6 | 137687961 | 137727961 | 137707961 | G | A | 5.4744901 | Zm00001d037785 |
| EH_BS   | 7 | 64413742  | 64453742  | 64433742  | T | C | 5.0527132 | NA             |
| EH_BS   | 7 | 83073842  | 83113842  | 83093842  | A | G | 4.803447  | NA             |
| EH_BS   | 7 | 120138598 | 120178619 | 120158598 | A | G | 4.8623133 | NA             |
| EH_BS   | 8 | 127305009 | 127345009 | 127325009 | C | T | 5.0385384 | Zm00001d010762 |
| EH_BS   | 8 | 127305009 | 127345009 | 127325009 | C | T | 5.0385384 | Zm00001d010763 |
| EH_BS   | 8 | 127305009 | 127345009 | 127325009 | C | T | 5.0385384 | Zm00001d010764 |
| EH_DH   | 1 | 208261050 | 208301050 | 208281050 | T | G | 5.0767803 | NA             |
| EH_DH   | 1 | 208653533 | 208693575 | 208673575 | C | A | 4.8122121 | Zm00001d031985 |
| EH_DH   | 1 | 210023412 | 210063476 | 210043412 | G | A | 6.3178167 | NA             |
| EH_DH   | 1 | 210195708 | 210235708 | 210215708 | G | A | 4.7369046 | Zm00001d032040 |
| EH_DH   | 1 | 254664146 | 254704146 | 254684146 | C | T | 4.8283817 | Zm00001d033218 |
| EH_DH   | 5 | 131952580 | 131992668 | 131972668 | G | A | 4.9157612 | NA             |
| EH_DH   | 5 | 136979867 | 137019867 | 136999867 | T | C | 4.6488887 | NA             |
| EH_DH   | 7 | 64413742  | 64453742  | 64433742  | T | C | 4.6742028 | NA             |
| EH_DH   | 9 | 58045933  | 58085985  | 58065985  | C | T | 5.2140184 | NA             |
| PH.BLUP | 1 | 205988766 | 206028766 | 206008766 | C | T | 4.6792534 | Zm00001d031899 |
| PH.BLUP | 1 | 206070508 | 206110508 | 206090508 | A | G | 4.6476066 | Zm00001d031901 |
| PH.BLUP | 1 | 207462464 | 207502507 | 207482494 | T | C | 5.9619176 | Zm00001d031938 |
| PH.BLUP | 1 | 208261050 | 208301050 | 208281050 | T | G | 4.8059789 | NA             |
| PH.BLUP | 1 | 208649508 | 208693575 | 208673575 | C | A | 5.4540778 | Zm00001d031985 |
| PH.BLUP | 1 | 208731861 | 208771861 | 208751861 | T | C | 4.9796332 | Zm00001d031986 |
| PH.BLUP | 1 | 208731861 | 208771861 | 208751861 | T | C | 4.9796332 | Zm00001d031987 |
| PH.BLUP | 1 | 210023412 | 210063476 | 210043412 | G | A | 6.5287448 | NA             |
| PH.BLUP | 1 | 210645124 | 210685314 | 210665164 | A | G | 4.9627166 | NA             |
| PH.BLUP | 1 | 246448926 | 246489161 | 246468988 | G | T | 5.0886551 | NA             |
| PH.BLUP | 1 | 252292837 | 252332837 | 252312837 | T | C | 4.9099356 | NA             |
| PH.BLUP | 2 | 20859902  | 20899938  | 20879913  | A | G | 4.680562  | NA             |
| PH.BLUP | 2 | 21776615  | 21816615  | 21796615  | G | A | 4.5537857 | Zm00001d002757 |
| PH.BLUP | 2 | 21776615  | 21816615  | 21796615  | G | A | 4.5537857 | Zm00001d002758 |

|         |    |           |           |           |   |   |           |                |
|---------|----|-----------|-----------|-----------|---|---|-----------|----------------|
| PH.BLUP | 2  | 140026410 | 140066422 | 140046410 | A | G | 5.0273739 | Zm00001d004800 |
| PH.BLUP | 2  | 160018044 | 160058141 | 160038044 | C | A | 5.6017701 | NA             |
| PH.BLUP | 5  | 89796073  | 89836200  | 89816174  | G | A | 5.809789  | Zm00001d015433 |
| PH.BLUP | 6  | 46155100  | 46195172  | 46175100  | T | C | 5.1918177 | Zm00001d035762 |
| PH.BLUP | 6  | 86683175  | 86723175  | 86703175  | C | A | 4.616307  | NA             |
| PH.BLUP | 6  | 137687961 | 137727961 | 137707961 | G | A | 6.8002822 | Zm00001d037785 |
| PH.BLUP | 10 | 149336827 | 149376827 | 149356827 | C | A | 4.7838454 | Zm00001d026645 |
| PH.BLUP | 10 | 149336827 | 149376827 | 149356827 | C | A | 4.7838454 | Zm00001d026647 |
| PH.BLUP | 10 | 149336827 | 149376827 | 149356827 | C | A | 4.7838454 | Zm00001d026648 |
| PH_BS   | 1  | 207462494 | 207502507 | 207482494 | T | C | 5.3912721 | Zm00001d031938 |
| PH_BS   | 1  | 210645124 | 210685314 | 210665164 | A | G | 4.8658003 | NA             |
| PH_BS   | 2  | 140026410 | 140066422 | 140046422 | G | A | 5.938649  | Zm00001d004800 |
| PH_BS   | 2  | 160018044 | 160058076 | 160038044 | C | A | 4.8430635 | NA             |
| PH_BS   | 6  | 137687961 | 137727961 | 137707961 | G | A | 5.2787863 | Zm00001d037785 |
| PH_BS   | 8  | 42544592  | 42584592  | 42564592  | C | T | 4.7121138 | Zm00001d009205 |
| PH_BS   | 8  | 100212891 | 100252891 | 100232891 | C | T | 4.6496331 | NA             |
| PH_DH   | 1  | 202345107 | 202385151 | 202365107 | G | A | 5.3592168 | Zm00001d031806 |
| PH_DH   | 1  | 208653533 | 208693575 | 208673575 | C | A | 5.2644402 | Zm00001d031985 |
| PH_DH   | 1  | 210023412 | 210063476 | 210043412 | G | A | 7.1654391 | NA             |
| PH_DH   | 1  | 210195708 | 210235708 | 210215708 | G | A | 5.0043666 | Zm00001d032040 |
| PH_DH   | 2  | 191342024 | 191382024 | 191362024 | C | T | 4.7312674 | Zm00001d005873 |
| PH_DH   | 4  | 231414376 | 231454419 | 231434390 | C | T | 5.4421813 | Zm00001d053438 |
| PH_DH   | 5  | 89796073  | 89836200  | 89816174  | G | A | 6.2568034 | Zm00001d015433 |
| PH_DH   | 5  | 186463923 | 186503923 | 186483923 | G | A | 4.7942828 | Zm00001d017130 |
| PH_DH   | 5  | 186463923 | 186503923 | 186483923 | G | A | 4.7942828 | Zm00001d017131 |
| PH_DH   | 6  | 23007769  | 23047769  | 23027769  | C | T | 4.6212948 | NA             |
| PH_DH   | 6  | 46155100  | 46195172  | 46175100  | T | C | 4.9862364 | Zm00001d035762 |
| PH_DH   | 6  | 137687961 | 137727961 | 137707961 | G | A | 7.3784155 | Zm00001d037785 |
| EP.BLUP | 8  | 127305009 | 127345009 | 127325009 | C | T | 4.6422572 | Zm00001d010762 |
| EP.BLUP | 8  | 127305009 | 127345009 | 127325009 | C | T | 4.6422572 | Zm00001d010763 |
| EP.BLUP | 8  | 127305009 | 127345009 | 127325009 | C | T | 4.6422572 | Zm00001d010764 |



|         |    |           |           |           |   |   |           |                |
|---------|----|-----------|-----------|-----------|---|---|-----------|----------------|
| EP.BLUP | 9  | 42984112  | 43024112  | 43004112  | G | C | 4.5895719 | NA             |
| EP.BLUP | 10 | 35228167  | 35268167  | 35248167  | T | G | 5.6374719 | NA             |
| EP.BLUP | 10 | 62314395  | 62354395  | 62334395  | G | A | 4.9116966 | Zm00001d024292 |
| EP.BLUP | 10 | 62314395  | 62354395  | 62334395  | G | A | 4.9116966 | Zm00001d024293 |
| EP_BS   | 2  | 236939420 | 236979420 | 236959420 | A | G | 4.9850244 | Zm00001d007652 |
| EP_BS   | 5  | 36900481  | 36940505  | 36920490  | G | A | 5.3100178 | NA             |
| EP_BS   | 6  | 78239284  | 78279284  | 78259284  | A | G | 4.6525941 | Zm00001d036230 |
| EP_BS   | 8  | 105913692 | 105953692 | 105933692 | C | T | 4.5599045 | Zm00001d010248 |
| EP_BS   | 8  | 127305009 | 127345009 | 127325009 | C | T | 6.1185882 | Zm00001d010762 |
| EP_BS   | 8  | 127305009 | 127345009 | 127325009 | C | T | 6.1185882 | Zm00001d010763 |
| EP_BS   | 8  | 127305009 | 127345009 | 127325009 | C | T | 6.1185882 | Zm00001d010764 |
| EP_BS   | 8  | 132328643 | 132368643 | 132348643 | T | C | 4.6221645 | Zm00001d010892 |
| EP_BS   | 8  | 134386114 | 134426114 | 134406114 | G | A | 4.7831934 | Zm00001d010942 |
| EP_BS   | 8  | 134386114 | 134426114 | 134406114 | G | A | 4.7831934 | Zm00001d010943 |
| EP_BS   | 8  | 134386114 | 134426114 | 134406114 | G | A | 4.7831934 | Zm00001d010944 |
| EP_BS   | 8  | 134705969 | 134745969 | 134725969 | C | T | 4.8102787 | NA             |
| EP_BS   | 9  | 114001372 | 114041456 | 114021456 | T | G | 5.4925884 | NA             |
| EP_DH   | 1  | 21636844  | 21676844  | 21656844  | A | G | 4.8931104 | NA             |
| EP_DH   | 1  | 157820817 | 157860853 | 157840853 | G | A | 4.7249472 | Zm00001d030745 |
| EP_DH   | 9  | 42984112  | 43024112  | 43004112  | G | C | 4.9589229 | NA             |
| EP_DH   | 10 | 35228167  | 35268167  | 35248167  | T | G | 4.6337593 | NA             |
| EP_DH   | 10 | 58333427  | 58373427  | 58353427  | A | G | 4.6925294 | Zm00001d024227 |
| EP_DH   | 10 | 58333427  | 58373427  | 58353427  | A | G | 4.6925294 | Zm00001d024228 |

Supplemental Table 4. QTLs located in three RIL populations

| Pop.   | Trait | QTL                | Chr | Position(cM) | LOD      | Additive effect | Dominant effect | R2       |
|--------|-------|--------------------|-----|--------------|----------|-----------------|-----------------|----------|
| CML312 | PH    | QTL <sub>PH</sub>  | 4   | 352.81       | 2.614549 | 11.5118         | 0               | 0.076677 |
| CML312 | EH    | QTL <sub>EH</sub>  | 1   | 417.51       | 2.67101  | -4.9057         | 0               | 0.071404 |
| CML312 | EP    | QTL <sub>EP</sub>  | 1   | 417.61       | 2.579805 | -0.0164         | 0               | 0.067695 |
| D39    | PH    | QTL1 <sub>PH</sub> | 1   | 62.71        | 4.060803 | -8.141          | 0               | 0.099773 |
| D39    | PH    | QTL2 <sub>PH</sub> | 1   | 72.91        | 2.838219 | -6.4119         | 0               | 0.058696 |
| D39    | PH    | QTL3 <sub>PH</sub> | 1   | 258.81       | 3.485342 | -8.0321         | 0               | 0.071515 |
| D39    | EH    | QTL1 <sub>EH</sub> | 7   | 166.71       | 5.150923 | 8.3333          | 0               | 0.109641 |
| D39    | EH    | QTL2 <sub>EH</sub> | 7   | 186.71       | 2.638436 | -5.7303         | 0               | 0.056512 |
| D39    | EP    | QTL1 <sub>EP</sub> | 1   | 147.71       | 3.93051  | -0.0331         | 0               | 0.087208 |
| D39    | EP    | QTL2 <sub>EP</sub> | 3   | 422.31       | 2.736156 | -0.0296         | 0               | 0.141603 |
| D39    | EP    | QTL3 <sub>EP</sub> | 6   | 167.21       | 3.774159 | 0.0197          | 0               | 0.091534 |
| D39    | EP    | QTL4 <sub>EP</sub> | 6   | 189.81       | 3.509229 | 0.0203          | 0               | 0.076262 |
| Y32    | EH    | QTL1 <sub>EH</sub> | 2   | 39.41        | 4.681868 | -8.5447         | 0               | 0.130797 |
| Y32    | EH    | QTL2 <sub>EH</sub> | 4   | 105.31       | 3.124864 | 5.7225          | 0               | 0.131509 |
| Y32    | EH    | QTL3 <sub>EH</sub> | 4   | 111.31       | 3.77633  | 6.0507          | 0               | 0.149375 |
| Y32    | EP    | QTL1 <sub>EP</sub> | 1   | 129.81       | 2.690554 | -0.0173         | 0               | 0.062739 |
| Y32    | EP    | QTL2 <sub>EP</sub> | 1   | 235.11       | 2.566775 | 0.0182          | 0               | 0.075468 |
| Y32    | EP    | QTL3 <sub>EP</sub> | 3   | 284.51       | 2.527687 | -0.0158         | 0               | 0.059941 |
| Y32    | EP    | QTL4 <sub>EP</sub> | 6   | 191.71       | 3.172638 | -0.0223         | 0               | 0.091879 |

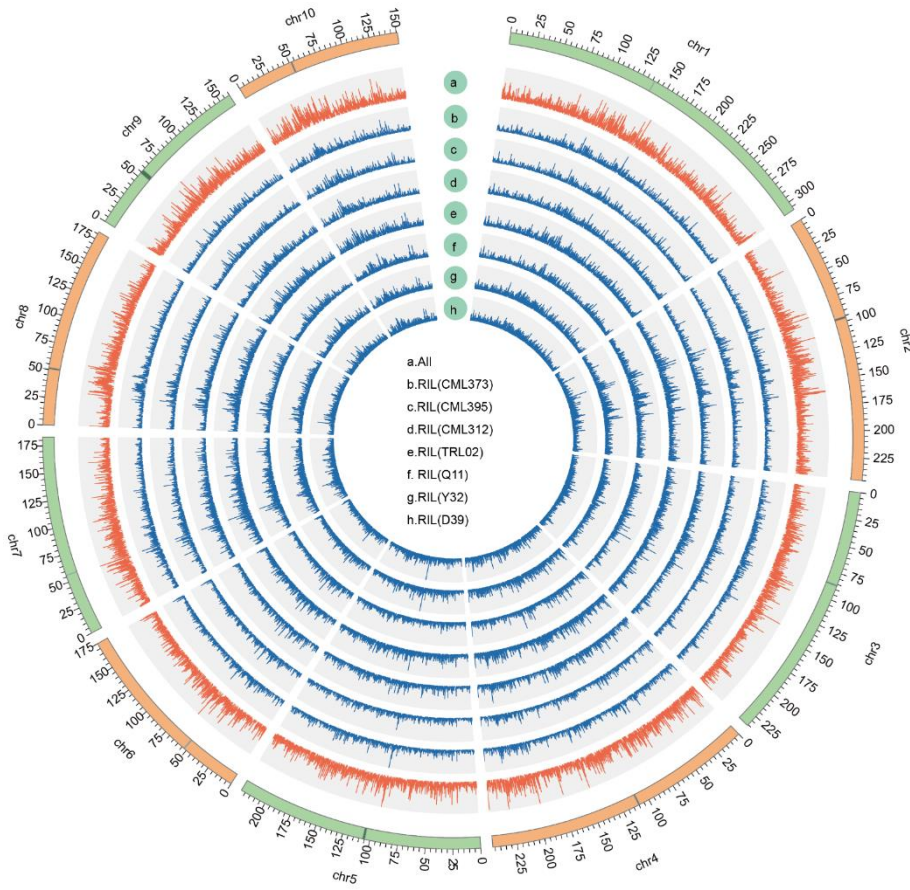

Supplemental Figure 1. Distribution of SNP on 10 chromosomes in seven RIL populations

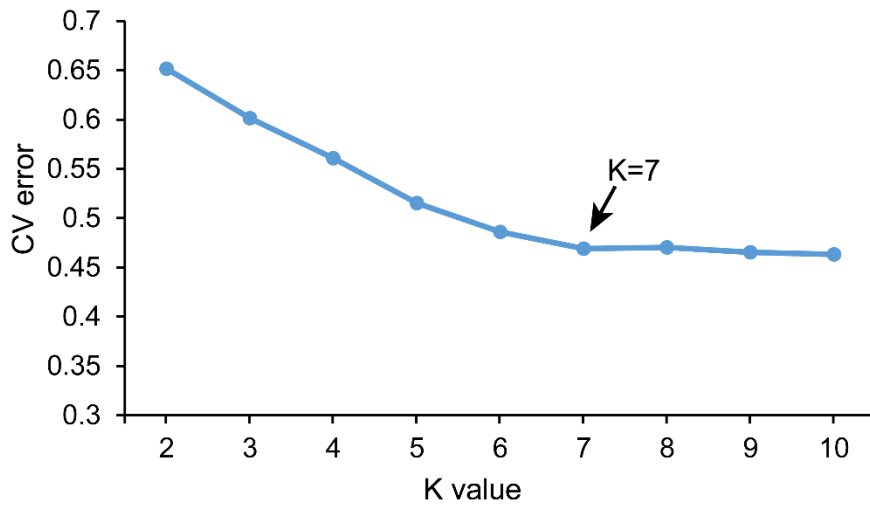

Supplemental Figure 2. The CV error plotted for different values of K showed the lowest error rate at K=7.

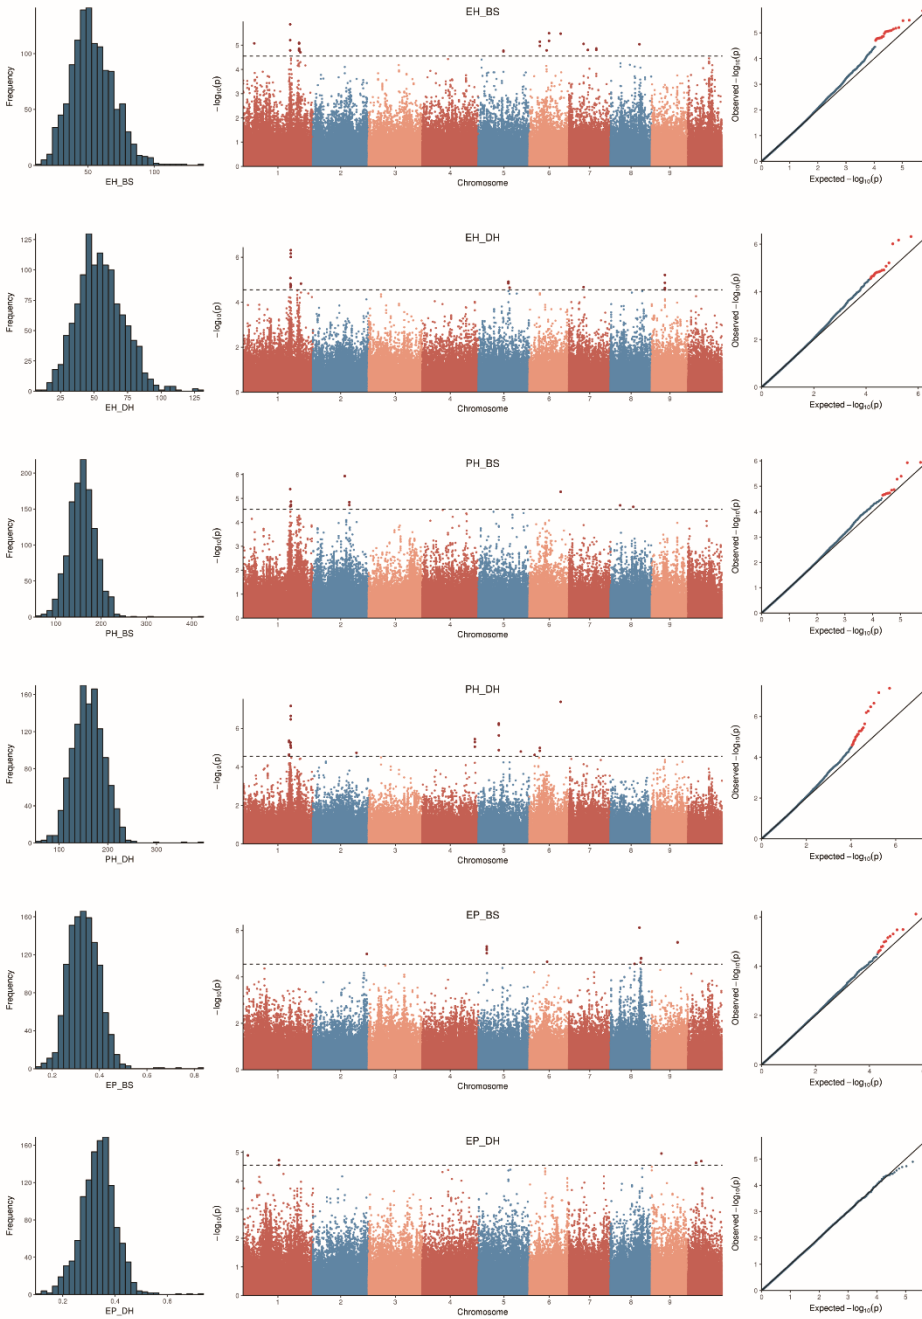

Supplemental Figure 3. Phenotypic distribution, Manhattan and QQ-plot of genome-wide association study for ear height (EH), plant height (PH) and ratio of EH/PH in Baoshan (BS) and Dehong (DH).

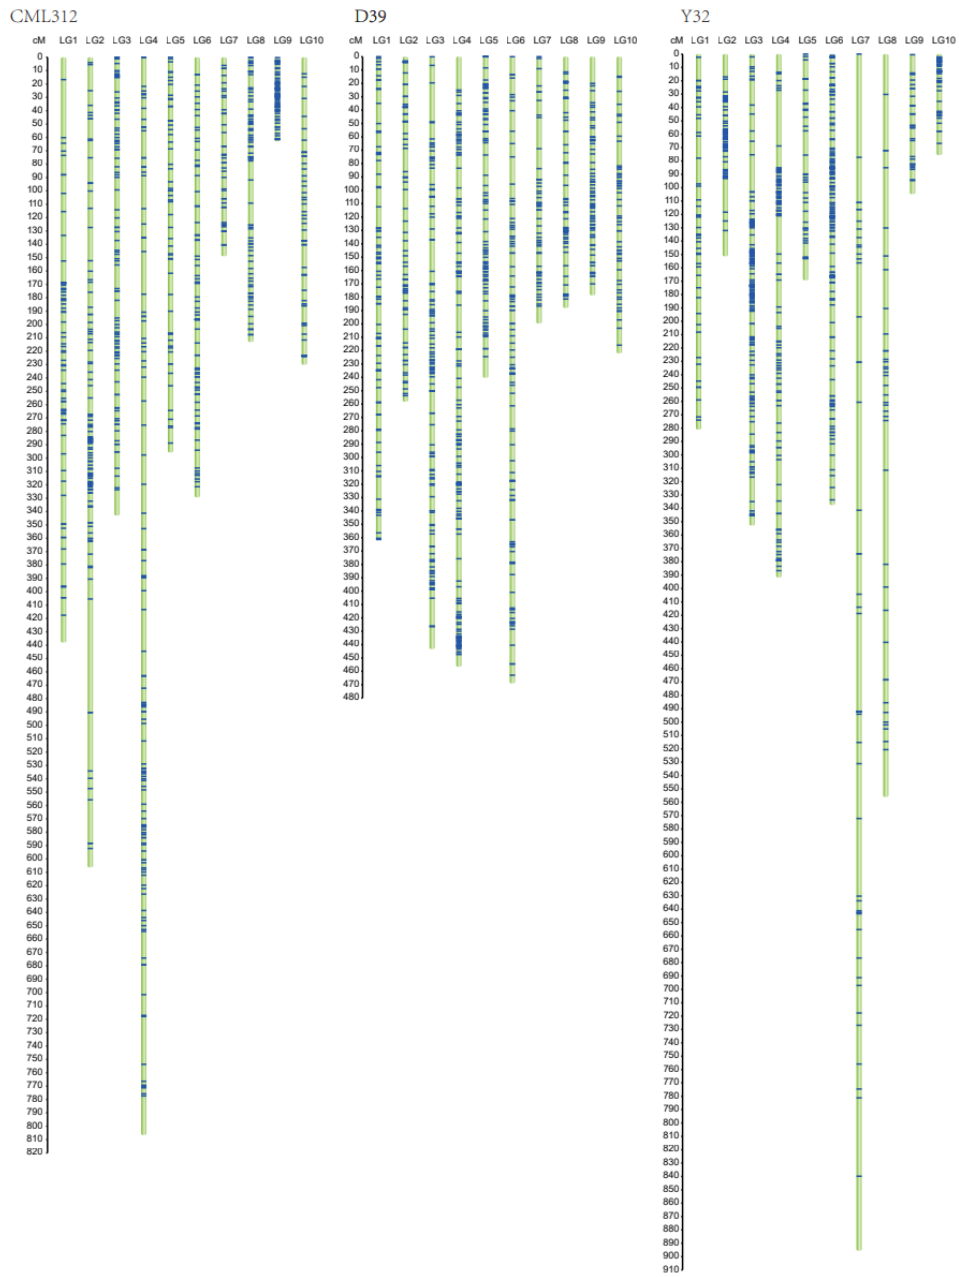

Supplemental Figure 4. Genetic linkage map of CML312, D39 and Y32 RIL population.

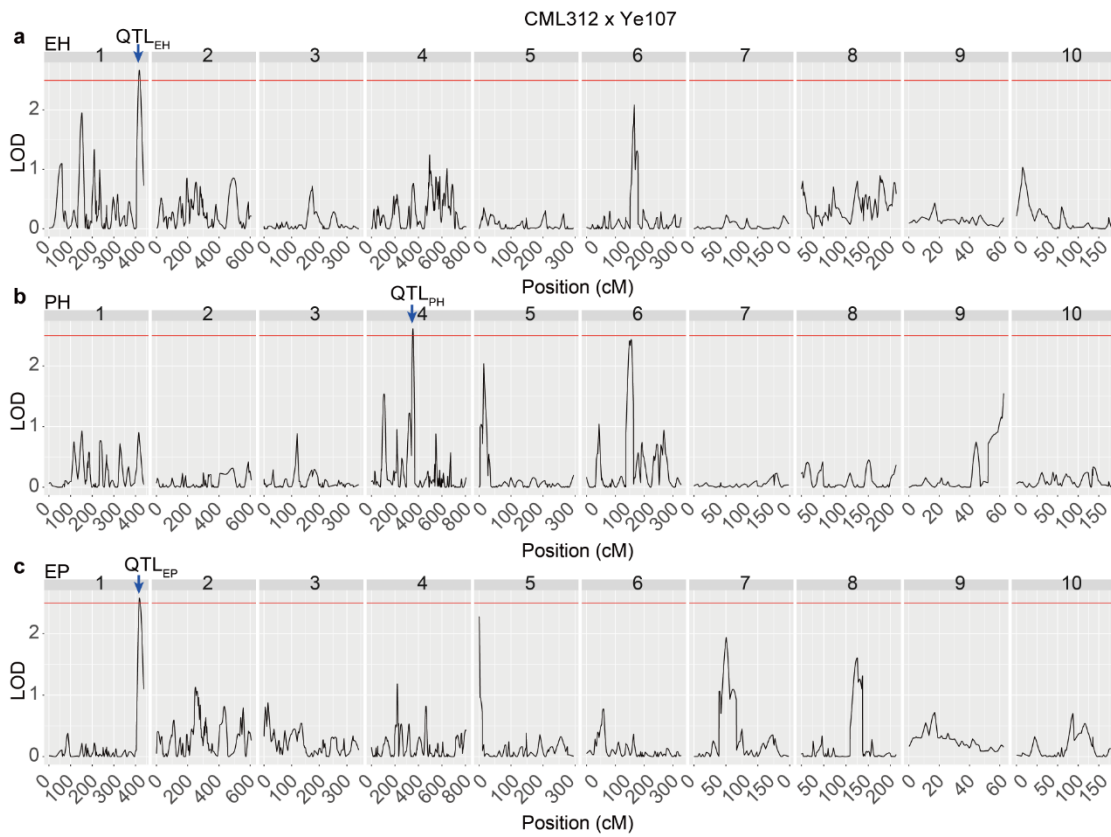

Supplemental Figure 5. QTL map of CML312 RIL population for EH (a), PH (b) and EP (c).

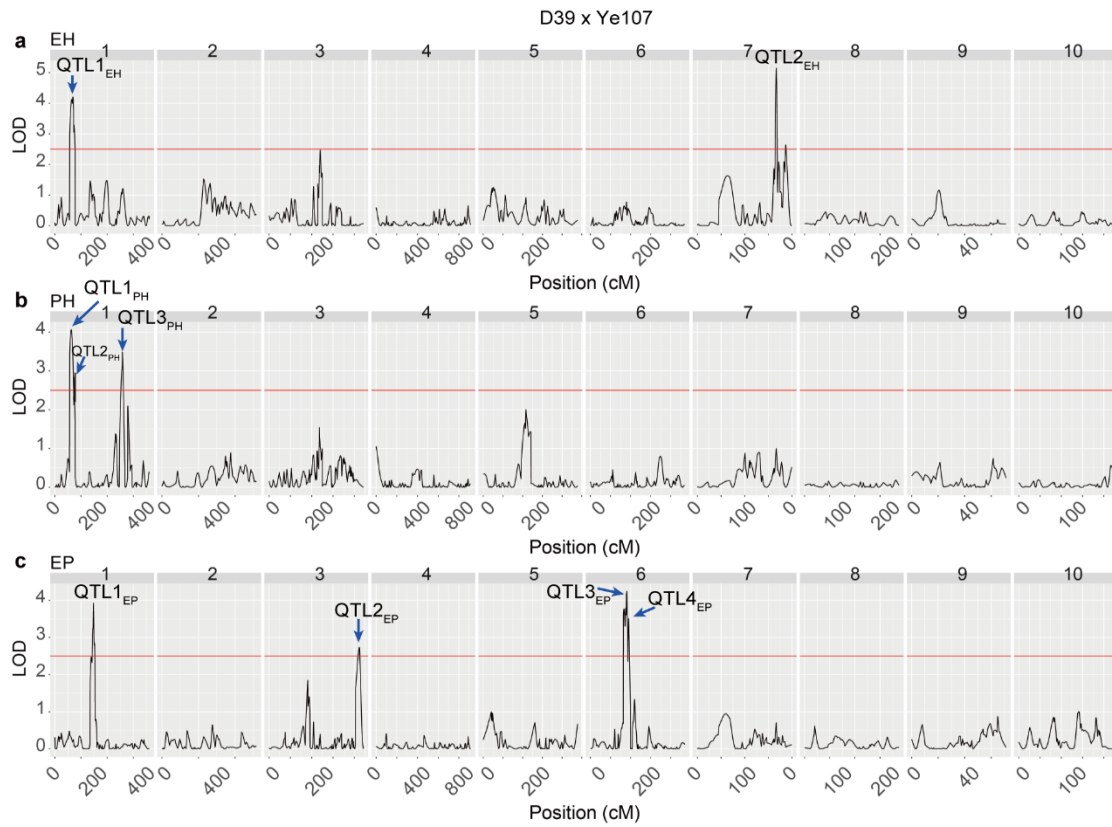

Supplemental Figure 6. QTL map of D39 RIL population for EH (a), PH (b) and EP (c).



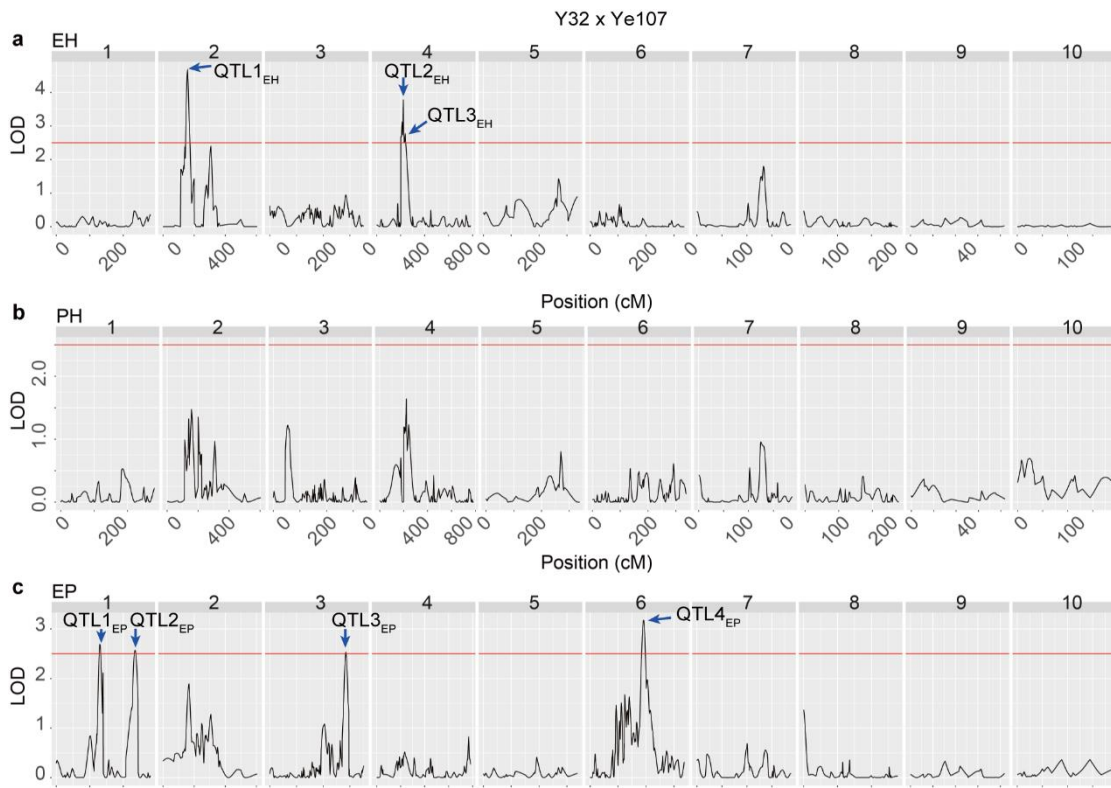

Supplemental Figure 7. QTL map of Y32 RIL population for EH (a), PH (b) and EP (c)
